# Supplementary material
Source: publisher figshare collection journal article supplement (https://gsapubs.figshare.com/ndownloader/files/23731655)
Supplement: Supplementary file 1 [file 23731655]

## Sheet: S2. Figure 2 summary data
Supplementary Data Table S2: Stable isotope data included in Figure 2 of the manuscript
Description: Summary (average, minimum, and maximum) carbon and oxygen stable isotope data for each sampled Lahillia larseni shell included in Figure 2 of the manuscript. Includes the location where the samples were analyzed (either the University of Alabama, UA, or the Unviersity of Michigan, UM), the resolution of sampling (either high/subannual or low), the Preservation Index (PI) Ranking for …
Analyzed at:	Sampling Resolution	PI Rank	Shell ID	Interval	Stratigraphic height of shell, relative to the K-Pg boundary (m)	Stratigraphic height of shell, relative to the K-Pg boundary (m), with random vertical jitter for plotting in Figure 2	Minimum stratigraphic height relative to the K-Pg (m)	Maximum stratigraphic height relative to the K-Pg (m)	Average δ13C (‰ VPDB)	Minimum δ13C (‰ VPDB)	Maximum δ13C (‰ VPDB)	Average δ18O (‰ VPDB)	Minimum δ18O (‰ VPDB)	Maximum δ18O (‰ VPDB)
UM (Oliphant)	low	NA	L776A	0	-233	-232.81	-238	-228	0.77119	-1.6	2.79	1.29714	0.75	1.79
UM (Oliphant)	low	NA	L1609	0	-171	-170.7	-176	-166	1.11917	-0.71	2.63	1.01583	0.58	1.42
UM (Dutton)	high	NA	D-L757b	0	-133	-133.03	-138	-128	0.67772	-0.27064	1.63846	1.80993	1.48154	2.48629
UA	high	4	UWBM-107335	0	-91.1	-91.5	-92.1	-90.1	1.32223	0.15	1.74	0.7688	-1.29071	1.04849
UA	low	4.5	UWBM-107339	0	-87.6	-88.1	-88.6	-86.6	1.15667	0.17	1.74	0.58198	0.48868	0.64863
UM (Dutton)	high	NA	D-L1480E	0	-85	-84.87	-90	-80	-1.26866	-1.72489	-0.49005	0.84428	0.57512	1.33581
UM (Dutton)	high	NA	D-L1480B	0	-85	-85.27	-90	-80	0.20031	-0.65509	1.22801	1.13422	0.77984	1.57762
UM (Oliphant)	low	NA	L1474A	0	-42	-42.27	-47	-37	2.15727	-0.26	3.41	1.46364	0.83	2.03
UA	high	3	UWBM-109951	0	-35	-15.5	-35	0	-1.12059	-3.38667	0.1	0.82668	-0.451	1.29507
UA	high	2.5	UWBM-109952	0	-35	-16.5	-35	0	0.07394	-0.77	0.57	0.96746	0.54866	1.3284
UA	high	3	UWBM-109953	0	-35	-13.5	-35	0	-0.01765	-0.83	0.42	1.22111	0.78858	1.45835
UM (Oliphant)	low	NA	L1161	0	-7	-6.66	-12	-2	2.03	0.84	3.41	1.16714	0.92	1.56
UA	high	2.5	UWBM-107343	2	-4.2	-4.7	-5.2	-3.2	-5.50758	-21.58	-2.48	0.32401	-0.39102	0.75859
UA	low	2.5	UWBM-107332	2	-1.6	-2	-2.6	-0.6	-6.405	-11.32	0.32	1.00351	0.7186	1.24842
UA	high	4	UWBM-109954	2	-0.3	-0.3	-0.3	-0.3	0.13374	-0.4	0.64	1.02581	0.63863	1.29841
UM (Oliphant)	low	NA	L447D	2	0	-0.11	-1	1	-0.575	-4.02	1.84	1.247	0.96	1.6
UM (Dutton)	high	NA	D-1529A	2	1	0.77	0	2	-3.01876	-3.99422	-1.77219	0.36791	-0.36745	0.72145
UA	high	4	UWBM-109955	2	1.5	1.4	0	3	-9.59946	-13.09	-4.69	0.62459	-0.99081	1.10847
UA	low	3	UWBM-109956	2	1.5	1.9	0	3	0.48	0.13	1.18	0.48368	0.24876	0.62863
UA	high	3.5	UWBM-109957	2	1.5	1.2	0	3	-0.88521	-2.59	0.32	0.40567	-0.68092	1.35839
UA	high	3.5	UWBM-109958	2	15.7	15.8	14.7	16.7	-3.17316	-7.83667	-1.4	-0.50311	-0.90084	-0.23107
UA	low	3.5	UWBM-109959	2	26.4	26.3	25.4	27.4	-4.48	-12.99	0.07	0.13547	-0.10112	0.28875
UA	low	5	UWBM-109960	0	35.4	35.2	34.4	36.4	1.19333	0.83	1.49	0.00885	-0.06113	0.12881
UA	low	3.5	UWBM-109961	0	35.4	35.6	34.4	36.4	1.31167	1.06	1.475	0.46869	0.18879	0.61864
UM (Dutton)	high	NA	D-L1430A1	0	40	39.7	35	45	2.41421	2.01683	3.04243	1.3617	0.96717	1.69297
UA	high	4	UWBM-109962	0	46	46.1	45	47	0.72244	0.3	0.97	0.59998	-0.06113	1.0385
UA	low	2.5	UWBM-109963	0	56.6	56.1	55.6	57.6	0.75667	0.54	1.14	0.82523	0.75859	0.88855
UA	high	4	UWBM-109964	0	65	65.3	65	70	0.6725	0.38	0.92	0.67306	0.49868	0.86855

## Sheet: S3. High-Res Sampling data
Supplementary Data Table S3: Stable isotope data from Lahillia larseni shells serial-sampled at high (subannual) resolution
Description: Stable carbon and oxygen isotope data from the serial sampling of Lahillia larseni shells at high (subannual) resolution. Includes the stratigraphic height (m) of each sampled shell relative to the K-Pg boundary, the interval in which the shell occurs (2 for shells occurring in our "interval II" as designated in the mansucript, and 0 for shells falling outside our intervals I or II),…
Stratigraphic height of shell, relative to the K-Pg boundary (m)	Interval	Shell	Shell ID	Sampling Sequence ID	Sample Name	Distance from first sample on shell (mm)	δ13C (‰VPDB)	δ18O (‰VPDB)	notes
		UWBM-109964, Lahillia larseni
65	0		UWBM-109964	UWBM-109964-A	UWBM-109964-A01a	0	0.64	0.78	average of 3
65	0		UWBM-109964	UWBM-109964-A	UWBM-109964-A02	0.318	0.56	0.72
65	0		UWBM-109964	UWBM-109964-A	UWBM-109964-A03	0.636	0.38	0.87
65	0		UWBM-109964	UWBM-109964-A	UWBM-109964-A04	0.954	0.61	0.7
65	0		UWBM-109964	UWBM-109964-A	UWBM-109964-A05	1.272	0.58	0.77
65	0		UWBM-109964	UWBM-109964-A	UWBM-109964-A06	1.59	0.54	0.76
65	0		UWBM-109964	UWBM-109964-A	UWBM-109964-A07	1.908	0.53	0.66
65	0		UWBM-109964	UWBM-109964-A	UWBM-109964-A08	2.226	0.64	0.52
65	0		UWBM-109964	UWBM-109964-A	UWBM-109964-A09	2.544	0.72	0.69
65	0		UWBM-109964	UWBM-109964-A	UWBM-109964-A10	2.862	0.86	0.51
65	0		UWBM-109964	UWBM-109964-A	UWBM-109964-A11	3.18	0.66	0.61
65	0		UWBM-109964	UWBM-109964-A	UWBM-109964-A12	3.498	0.71	0.55
65	0		UWBM-109964	UWBM-109964-A	UWBM-109964-A13	3.816	0.68	0.61
65	0		UWBM-109964	UWBM-109964-A	UWBM-109964-A14	4.134	0.62	0.57
65	0		UWBM-109964	UWBM-109964-A	UWBM-109964-A15	4.452	0.65	0.73
65	0		UWBM-109964	UWBM-109964-A	UWBM-109964-A16	4.77	0.62	0.67
65	0		UWBM-109964	UWBM-109964-A	UWBM-109964-A17	5.088	0.68	0.5
65	0		UWBM-109964	UWBM-109964-A	UWBM-109964-A18	5.406	0.78	0.68
65	0		UWBM-109964	UWBM-109964-A	UWBM-109964-A19	5.724	0.81	0.68
65	0		UWBM-109964	UWBM-109964-A	UWBM-109964-A20	6.042	0.86	0.69
65	0		UWBM-109964	UWBM-109964-A	UWBM-109964-A21	6.36			Was skipped during acid injection in error
65	0		UWBM-109964	UWBM-109964-A	UWBM-109964-A22	6.678	0.55	0.87
65	0		UWBM-109964	UWBM-109964-A	UWBM-109964-A23	6.996	0.62	0.76
65	0		UWBM-109964	UWBM-109964-A	UWBM-109964-A24	7.314	0.92	0.67
65	0		UWBM-109964	UWBM-109964-A	UWBM-109964-A25	7.632	0.92	0.62
		UWBM-109962, Lahillia larseni
46	0		UWBM-109962	UWBM-109962-A	UWBM-109962-A01a	0	0.87	0.55	average of 3
46	0		UWBM-109962	UWBM-109962-A	UWBM-109962-A02	0.322	0.59	0.86
46	0		UWBM-109962	UWBM-109962-A	UWBM-109962-A03	0.644	0.55	0.76
46	0		UWBM-109962	UWBM-109962-A	UWBM-109962-A04	0.966	0.97	0.71
46	0		UWBM-109962	UWBM-109962-A	UWBM-109962-A05	1.288	0.94	0.72
46	0		UWBM-109962	UWBM-109962-A	UWBM-109962-A06	1.61	0.85	0.77
46	0		UWBM-109962	UWBM-109962-A	UWBM-109962-A07	1.932	0.94	0.4
46	0		UWBM-109962	UWBM-109962-A	UWBM-109962-A08	2.254	0.97	0.63
46	0		UWBM-109962	UWBM-109962-A	UWBM-109962-A09	2.576	0.83	0.79
46	0		UWBM-109962	UWBM-109962-A	UWBM-109962-A10	2.898	0.64	0.97
46	0		UWBM-109962	UWBM-109962-A	UWBM-109962-A11	3.22	0.63	0.74
46	0		UWBM-109962	UWBM-109962-A	UWBM-109962-A12	3.542	0.65	0.81
46	0		UWBM-109962	UWBM-109962-A	UWBM-109962-A13	3.864	0.8	-0.06
46	0		UWBM-109962	UWBM-109962-A	UWBM-109962-A14	4.186	0.86	0.32
46	0		UWBM-109962	UWBM-109962-A	UWBM-109962-A15	4.508	0.84	0.93
46	0		UWBM-109962	UWBM-109962-A	UWBM-109962-A16	4.83	0.84	0.17
46	0		UWBM-109962	UWBM-109962-A	UWBM-109962-A17	5.152	0.91	0.76
46	0		UWBM-109962	UWBM-109962-A	UWBM-109962-A18	5.474	0.82	0.47
46	0		UWBM-109962	UWBM-109962-A	UWBM-109962-A19	5.796	0.82	0.39
46	0		UWBM-109962	UWBM-109962-A	UWBM-109962-A20	6.118	0.64	0.44
46	0		UWBM-109962	UWBM-109962-A	UWBM-109962-A21	6.44	0.61	0.39
46	0		UWBM-109962	UWBM-109962-A	UWBM-109962-A22	6.762	0.83	0.47
46	0		UWBM-109962	UWBM-109962-A	UWBM-109962-A23	7.084	0.52	0.3
46	0		UWBM-109962	UWBM-109962-A	UWBM-109962-A24	7.406	0.56	0.27
46	0		UWBM-109962	UWBM-109962-A	UWBM-109962-A25	7.728	0.59	0.37
46	0		UWBM-109962	UWBM-109962-A	UWBM-109962-A26	8.05	0.45	0.51
46	0		UWBM-109962	UWBM-109962-A	UWBM-109962-A27	8.372	0.48	0.79
46	0		UWBM-109962	UWBM-109962-A	UWBM-109962-A28	8.694	0.44	1.04
46	0		UWBM-109962	UWBM-109962-A	UWBM-109962-A29	9.016	0.3	0.67
46	0		UWBM-109962	UWBM-109962-A	UWBM-109962-A30	9.338	0.79	0.7
46	0		UWBM-109962	UWBM-109962-A	UWBM-109962-A31	9.676	0.41	0.78
46	0		UWBM-109962	UWBM-109962-A	UWBM-109962-A32	10.014	0.69	0.89
46	0		UWBM-109962	UWBM-109962-A	UWBM-109962-A33	10.352	0.57	0.72
46	0		UWBM-109962	UWBM-109962-A	UWBM-109962-A34	10.69	0.67	0.86
46	0		UWBM-109962	UWBM-109962-A	UWBM-109962-A35	11.028	0.82	0.66
46	0		UWBM-109962	UWBM-109962-A	UWBM-109962-A36	11.366	0.81	0.3
46	0		UWBM-109962	UWBM-109962-A	UWBM-109962-A37	11.704	0.88	0.42
46	0		UWBM-109962	UWBM-109962-A	UWBM-109962-A38	12.042	0.89	0.6
46	0		UWBM-109962	UWBM-109962-A	UWBM-109962-A39	12.38	0.82	0.26
46	0		UWBM-109962	UWBM-109962-A	UWBM-109962-A40	12.718	0.78	0.41
46	0		UWBM-109962	UWBM-109962-A	UWBM-109962-A41	13.056	0.85	0.52
46	0		UWBM-109962	UWBM-109962-A	UWBM-109962-A42	13.394	0.85	0.66
46	0		UWBM-109962	UWBM-109962-A	UWBM-109962-A43	13.734			No sample collected
46	0		UWBM-109962	UWBM-109962-A	UWBM-109962-A44	14.074	0.61	0.91
46	0		UWBM-109962	UWBM-109962-A	UWBM-109962-A45	14.414	0.74	0.68
46	0		UWBM-109962	UWBM-109962-A	UWBM-109962-A46	14.754	0.59	0.75
		UWBM-109958, Lahillia larseni
15.7	2		UWBM-109958	UWBM-109958-A	UWBM-109958-A01	0	-3.7	-0.75
15.7	2		UWBM-109958	UWBM-109958-A	UWBM-109958-A02	0.339	-3.16	-0.23
15.7	2		UWBM-109958	UWBM-109958-A	UWBM-109958-A03	0.678	-3.4	-0.6
15.7	2		UWBM-109958	UWBM-109958-A	UWBM-109958-A04	1.017	-3.02	-0.52
15.7	2		UWBM-109958	UWBM-109958-A	UWBM-109958-A05	1.356	-2.96	-0.31
15.7	2		UWBM-109958	UWBM-109958-A	UWBM-109958-A06	1.695	-3.95	-0.33
15.7	2		UWBM-109958	UWBM-109958-A	UWBM-109958-A07	2.034	-4.89	-0.37
15.7	2		UWBM-109958	UWBM-109958-A	UWBM-109958-A08-2	2.373	-7.08	-0.54
15.7	2		UWBM-109958	UWBM-109958-A	UWBM-109958-A09	2.712	-5.1	-0.49
15.7	2		UWBM-109958	UWBM-109958-A	UWBM-109958-A10	3.051	-3.64	-0.41
15.7	2		UWBM-109958	UWBM-109958-A	UWBM-109958-A11a	3.39	-7.84	-0.63	average of 3
15.7	2		UWBM-109958	UWBM-109958-A	UWBM-109958-A12	3.708	-4.69	-0.9
15.7	2		UWBM-109958	UWBM-109958-A	UWBM-109958-A13	4.026	-1.97	-0.31
15.7	2		UWBM-109958	UWBM-109958-A	UWBM-109958-A14	4.344	-2.17	-0.37
15.7	2		UWBM-109958	UWBM-109958-A	UWBM-109958-A15	4.662	-1.96	-0.66
15.7	2		UWBM-109958	UWBM-109958-A	UWBM-109958-A16	4.98	-1.4	-0.57
15.7	2		UWBM-109958	UWBM-109958-A	UWBM-109958-A17	5.298	-1.4	-0.77
15.7	2		UWBM-109958	UWBM-109958-A	UWBM-109958-A18	5.616	-1.45	-0.65
15.7	2		UWBM-109958	UWBM-109958-A	UWBM-109958-A19	5.934	-1.67	-0.5
15.7	2		UWBM-109958	UWBM-109958-A	UWBM-109958-A20	6.252	-3.04	-0.67
15.7	2		UWBM-109958	UWBM-109958-A	UWBM-109958-A21	6.57	-3.14	-0.5
15.7	2		UWBM-109958	UWBM-109958-A	UWBM-109958-A22	6.905	-2.19	-0.37
15.7	2		UWBM-109958	UWBM-109958-A	UWBM-109958-A23	7.24	-1.77	-0.29
15.7	2		UWBM-109958	UWBM-109958-A	UWBM-109958-A24	7.575	-1.48	-0.37
15.7	2		UWBM-109958	UWBM-109958-A	UWBM-109958-A25	7.91	-1.44	-0.51
15.7	2		UWBM-109958	UWBM-109958-A	UWBM-109958-A26	8.245	-2.04	-0.31
15.7	2		UWBM-109958	UWBM-109958-A	UWBM-109958-A27	8.58	-2.66	-0.45
15.7	2		UWBM-109958	UWBM-109958-A	UWBM-109958-A28a	8.915	-4.13	-0.53
15.7	2		UWBM-109958	UWBM-109958-A	UWBM-109958-A29	9.25	-4.69	-0.66
		UWBM-109955, Lahillia larseni
1.5	2		UWBM-109955	UWBM-109955-E	UWBM-109955-E01	0	-4.69	0.95
1.5	2		UWBM-109955	UWBM-109955-E	UWBM-109955-E02a	0.306	-9.22	0.93	average of 2
1.5	2		UWBM-109955	UWBM-109955-E	UWBM-109955-E03	0.612	-10.96	0.78
1.5	2		UWBM-109955	UWBM-109955-E	UWBM-109955-E04a	0.918	-11.09	0.62	average of 3
1.5	2		UWBM-109955	UWBM-109955-E	UWBM-109955-E05	1.224	-9	0.76
1.5	2		UWBM-109955	UWBM-109955-E	UWBM-109955-E06	1.53	-8.94	0.65
1.5	2		UWBM-109955	UWBM-109955-E	UWBM-109955-E07	1.836	-11.77	0.76
1.5	2		UWBM-109955	UWBM-109955-E	UWBM-109955-E08	2.142	-12.23	0.42
1.5	2		UWBM-109955	UWBM-109955-E	UWBM-109955-E09	2.448	-7.83	-0.38
1.5	2		UWBM-109955	UWBM-109955-E	UWBM-109955-E10a	2.754	-6.08	1.06	average of 3
1.5	2		UWBM-109955	UWBM-109955-E	UWBM-109955-E11	3.069	-13.03	0.42
1.5	2		UWBM-109955	UWBM-109955-E	UWBM-109955-E12	3.384	-11.33	-0.99
1.5	2		UWBM-109955	UWBM-109955-E	UWBM-109955-E13	3.699	-9.28	0.68
1.5	2		UWBM-109955	UWBM-109955-E	UWBM-109955-E14	4.014	-11.59	0.62
1.5	2		UWBM-109955	UWBM-109955-E	UWBM-109955-E15	4.329	-13.09	0.73
1.5	2		UWBM-109955	UWBM-109955-E	UWBM-109955-E16	4.644	-12.93	0.6
1.5	2		UWBM-109955	UWBM-109955-E	UWBM-109955-E17	4.959	-8.21	0.79
1.5	2		UWBM-109955	UWBM-109955-E	UWBM-109955-E18	5.274	-5.38	1.06
1.5	2		UWBM-109955	UWBM-109955-E	UWBM-109955-E19	5.577	-9.97	0.36
1.5	2		UWBM-109955	UWBM-109955-E	UWBM-109955-E20	5.88	-11.28	0.11
1.5	2		UWBM-109955	UWBM-109955-E	UWBM-109955-E21	6.183	-11.91	0.35
1.5	2		UWBM-109955	UWBM-109955-E	UWBM-109955-E22	6.486	-8.43	0.81
1.5	2		UWBM-109955	UWBM-109955-E	UWBM-109955-E23	6.789	-6.19	1.11
1.5	2		UWBM-109955	UWBM-109955-E	UWBM-109955-E24	7.081	-9.88	0.83
1.5	2		UWBM-109955	UWBM-109955-E	UWBM-109955-E25	7.373	-7.75	1.03
1.5	2		UWBM-109955	UWBM-109955-E	UWBM-109955-E26	7.665	-6.84	0.91
1.5	2		UWBM-109955	UWBM-109955-E	UWBM-109955-E27	7.965	-10.89	0.63
1.5	2		UWBM-109955	UWBM-109955-E	UWBM-109955-E28	8.265	-9	0.92
		UWBM-109957, Lahillia larseni
1.5	2		UWBM-109957	UWBM-109957-A	UWBM-109957-A01	0	-2.13	1.15
1.5	2		UWBM-109957	UWBM-109957-A	UWBM-109957-A02	0.339	-1.72	1.1
1.5	2		UWBM-109957	UWBM-109957-A	UWBM-109957-A03	0.678	-1.66	0.91
1.5	2		UWBM-109957	UWBM-109957-A	UWBM-109957-A04	1.017	-1.64	1.1
1.5	2		UWBM-109957	UWBM-109957-A	UWBM-109957-A05	1.356	-1.88	1.16
1.5	2		UWBM-109957	UWBM-109957-A	UWBM-109957-A06	1.695	-1.77	1.07
1.5	2		UWBM-109957	UWBM-109957-A	UWBM-109957-A07	2.034	-1.42	1.2
1.5	2		UWBM-109957	UWBM-109957-A	UWBM-109957-A08	2.373	-1.07	1.08
1.5	2		UWBM-109957	UWBM-109957-A	UWBM-109957-A09	2.712	-0.71	1.13
1.5	2		UWBM-109957	UWBM-109957-A	UWBM-109957-A10	3.051	-0.56	1.02
1.5	2		UWBM-109957	UWBM-109957-A	UWBM-109957-A11	3.39	-0.35	1.07
1.5	2		UWBM-109957	UWBM-109957-A	UWBM-109957-A12	3.729	-0.21	1.17
1.5	2		UWBM-109957	UWBM-109957-A	UWBM-109957-A13	4.068	-0.24	1.16
1.5	2		UWBM-109957	UWBM-109957-A	UWBM-109957-A14	4.407	-0.19	1.07
1.5	2		UWBM-109957	UWBM-109957-A	UWBM-109957-A15	4.746	-0.38	1.14
1.5	2		UWBM-109957	UWBM-109957-A	UWBM-109957-A16	5.085	-0.46	1.01
1.5	2		UWBM-109957	UWBM-109957-A	UWBM-109957-A17	5.424	-0.48	1.1
1.5	2		UWBM-109957	UWBM-109957-A	UWBM-109957-A18	5.763	-0.58	1.1
1.5	2		UWBM-109957	UWBM-109957-A	UWBM-109957-A19	6.102	-0.47	1.14
1.5	2		UWBM-109957	UWBM-109957-A	UWBM-109957-A20	6.441	-0.35	1.05
1.5	2		UWBM-109957	UWBM-109957-A	UWBM-109957-A21	6.78	-0.41	1.08
1.5	2		UWBM-109957	UWBM-109957-A	UWBM-109957-A22	7.119	-0.42	1.22
1.5	2		UWBM-109957	UWBM-109957-A	UWBM-109957-A23	7.458	-0.61	1.19
1.5	2		UWBM-109957	UWBM-109957-A	UWBM-109957-A24	7.797	-0.72	1.36
1.5	2		UWBM-109957	UWBM-109957-C	UWBM-109957-C01	26.5	-2.1	0.04
1.5	2		UWBM-109957	UWBM-109957-C	UWBM-109957-C02	26.8	-2.37	-0.04
1.5	2		UWBM-109957	UWBM-109957-C	UWBM-109957-C03	27.128	-2.26	0.19
1.5	2		UWBM-109957	UWBM-109957-C	UWBM-109957-C04	27.456	-1.97	0.08
1.5	2		UWBM-109957	UWBM-109957-C	UWBM-109957-C05	27.784	-1.81	0.2
1.5	2		UWBM-109957	UWBM-109957-C	UWBM-109957-C06	28.112	-1.38	-0.1
1.5	2		UWBM-109957	UWBM-109957-C	UWBM-109957-C07	28.44	-1.23	0.46
1.5	2		UWBM-109957	UWBM-109957-C	UWBM-109957-C08	28.768	-0.85	0.47
1.5	2		UWBM-109957	UWBM-109957-C	UWBM-109957-C09	29.096	-0.92	0.41
1.5	2		UWBM-109957	UWBM-109957-C	UWBM-109957-C10	29.424	-0.47	0.53
1.5	2		UWBM-109957	UWBM-109957-C	UWBM-109957-C11	29.752	-0.08	0.42
1.5	2		UWBM-109957	UWBM-109957-C	UWBM-109957-C12	30.08	-0.33	0.45
1.5	2		UWBM-109957	UWBM-109957-C	UWBM-109957-C13a	30.408	-0.32	0.3	average of 3
1.5	2		UWBM-109957	UWBM-109957-C	UWBM-109957-C14	30.736	-0.94	0.41
1.5	2		UWBM-109957	UWBM-109957-C	UWBM-109957-C15	31.064	-0.29	0.65
1.5	2		UWBM-109957	UWBM-109957-C	UWBM-109957-C16	31.392	-0.06	0.1
1.5	2		UWBM-109957	UWBM-109957-C	UWBM-109957-C17	31.72	-0.29	0.38
1.5	2		UWBM-109957	UWBM-109957-C	UWBM-109957-C18	32.048	-0.48	0.28
1.5	2		UWBM-109957	UWBM-109957-C	UWBM-109957-C19	32.376	-0.94	0.07
1.5	2		UWBM-109957	UWBM-109957-C	UWBM-109957-C20a	32.704	-1.84	-0.12	average of 2
1.5	2		UWBM-109957	UWBM-109957-C	UWBM-109957-C21	33.024	-2.18	0.1
1.5	2		UWBM-109957	UWBM-109957-C	UWBM-109957-C22	33.344	-1.63	-0.08
1.5	2		UWBM-109957	UWBM-109957-C	UWBM-109957-C23	33.664	-1.28	0
1.5	2		UWBM-109957	UWBM-109957-C	UWBM-109957-C24	33.984	-0.92	0
1.5	2		UWBM-109957	UWBM-109957-C	UWBM-109957-C25	34.304	-0.68	0.26
1.5	2		UWBM-109957	UWBM-109957-C	UWBM-109957-C26	34.624	-0.58	0.1
1.5	2		UWBM-109957	UWBM-109957-C	UWBM-109957-C27	34.944	-0.32	0.13
1.5	2		UWBM-109957	UWBM-109957-C	UWBM-109957-C28	35.264	-0.39	-0.2
1.5	2		UWBM-109957	UWBM-109957-C	UWBM-109957-C29	35.584	-0.19	0.05
1.5	2		UWBM-109957	UWBM-109957-C	UWBM-109957-C30	35.904	-0.1	0.23
1.5	2		UWBM-109957	UWBM-109957-C	UWBM-109957-C31	36.224	0.05	-0.04
1.5	2		UWBM-109957	UWBM-109957-C	UWBM-109957-C32	36.544	-0.55	-0.09
1.5	2		UWBM-109957	UWBM-109957-C	UWBM-109957-C33	36.864	-1.06	-0.68
1.5	2		UWBM-109957	UWBM-109957-C	UWBM-109957-C34	37.184	-1.65	-0.31
1.5	2		UWBM-109957	UWBM-109957-C	UWBM-109957-C35	37.504	-2.59	-0.28
1.5	2		UWBM-109957	UWBM-109957-C	UWBM-109957-C36	37.835	-1.56	0.15
1.5	2		UWBM-109957	UWBM-109957-C	UWBM-109957-C37	38.166	-1.46	0.28
1.5	2		UWBM-109957	UWBM-109957-C	UWBM-109957-C38	38.497	-1.04	-0.04
1.5	2		UWBM-109957	UWBM-109957-C	UWBM-109957-C39	38.828	-0.65	0.38
1.5	2		UWBM-109957	UWBM-109957-C	UWBM-109957-C40	39.159	-0.74	0.39
1.5	2		UWBM-109957	UWBM-109957-C	UWBM-109957-C41	39.49	-0.67	0.19
1.5	2		UWBM-109957	UWBM-109957-C	UWBM-109957-C42	39.821	-0.81	0.3
1.5	2		UWBM-109957	UWBM-109957-C	UWBM-109957-C43	40.152	-0.68	0.29
1.5	2		UWBM-109957	UWBM-109957-C	UWBM-109957-C44	40.483	-0.57	0.08
1.5	2		UWBM-109957	UWBM-109957-C	UWBM-109957-C45	40.814	-0.56	-0.01
1.5	2		UWBM-109957	UWBM-109957-C	UWBM-109957-C46	41.145	-0.54	0.16
1.5	2		UWBM-109957	UWBM-109957-C	UWBM-109957-C47	41.476	-0.41	0.19
1.5	2		UWBM-109957	UWBM-109957-C	UWBM-109957-C48	41.807	-0.5	-0.04
1.5	2		UWBM-109957	UWBM-109957-C	UWBM-109957-C49	42.138	-0.24	-0.07
1.5	2		UWBM-109957	UWBM-109957-C	UWBM-109957-C50	42.469	-1.02	0.25
1.5	2		UWBM-109957	UWBM-109957-C	UWBM-109957-C51	42.8	-1.2	0.02
1.5	2		UWBM-109957	UWBM-109957-C	UWBM-109957-C52	43.131	0.32	0.14
1.5	2		UWBM-109957	UWBM-109957-C	UWBM-109957-C53	43.462	-0.13	-0.14
1.5	2		UWBM-109957	UWBM-109957-C	UWBM-109957-C54	43.793	-0.17	-0.3
1.5	2		UWBM-109957	UWBM-109957-C	UWBM-109957-C55	44.124	-0.9	-0.41
1.5	2		UWBM-109957	UWBM-109957-C	UWBM-109957-C56	44.455	-1.86	-0.4
		UWBM-109954, Lahillia larseni
-0.3	2		UWBM-109954	UWBM-109954-A	UWBM-109954-A01	0	0.29	0.73
-0.3	2		UWBM-109954	UWBM-109954-A	UWBM-109954-A02	0.315	0.07	0.98
-0.3	2		UWBM-109954	UWBM-109954-A	UWBM-109954-A03a	0.63	-0.01	1.06	average of 3
-0.3	2		UWBM-109954	UWBM-109954-A	UWBM-109954-A04	0.945	0.29	0.93
-0.3	2		UWBM-109954	UWBM-109954-A	UWBM-109954-A05	1.26	0.31	0.77
-0.3	2		UWBM-109954	UWBM-109954-A	UWBM-109954-A06	1.575	0.22	0.79
-0.3	2		UWBM-109954	UWBM-109954-A	UWBM-109954-A07	1.89	0.11	0.88
-0.3	2		UWBM-109954	UWBM-109954-A	UWBM-109954-A08	2.205	0.09	0.97
-0.3	2		UWBM-109954	UWBM-109954-A	UWBM-109954-A09	2.52	0.11	0.96
-0.3	2		UWBM-109954	UWBM-109954-A	UWBM-109954-A10	2.835	0.19	0.89
-0.3	2		UWBM-109954	UWBM-109954-A	UWBM-109954-A11	3.15	0.23	0.82
-0.3	2		UWBM-109954	UWBM-109954-A	UWBM-109954-A12	3.465	0.22	1.07
-0.3	2		UWBM-109954	UWBM-109954-A	UWBM-109954-A13	3.78	0.29	0.82
-0.3	2		UWBM-109954	UWBM-109954-A	UWBM-109954-A14	4.095	0.45	0.89
-0.3	2		UWBM-109954	UWBM-109954-A	UWBM-109954-A15a	4.41	0.58	0.93	average of 3
-0.3	2		UWBM-109954	UWBM-109954-A	UWBM-109954-A16	4.725	0.63	1.02
-0.3	2		UWBM-109954	UWBM-109954-A	UWBM-109954-A17	5.04	0.6	0.88
-0.3	2		UWBM-109954	UWBM-109954-A	UWBM-109954-A18	5.355	0.64	0.75
-0.3	2		UWBM-109954	UWBM-109954-A	UWBM-109954-A19	5.67	0.61	0.73
-0.3	2		UWBM-109954	UWBM-109954-A	UWBM-109954-A20	5.985	0.47	0.71
-0.3	2		UWBM-109954	UWBM-109954-A	UWBM-109954-A21	6.3	0.18	1.12
-0.3	2		UWBM-109954	UWBM-109954-A	UWBM-109954-A22	6.617	-0.13	1.29
-0.3	2		UWBM-109954	UWBM-109954-A	UWBM-109954-A23	6.934	-0.15	1.21
-0.3	2		UWBM-109954	UWBM-109954-A	UWBM-109954-A24	7.251	-0.23	1.1
-0.3	2		UWBM-109954	UWBM-109954-A	UWBM-109954-A25	7.568	-0.19	1.21
-0.3	2		UWBM-109954	UWBM-109954-A	UWBM-109954-A26	7.885	-0.18	1.09
-0.3	2		UWBM-109954	UWBM-109954-A	UWBM-109954-A27	8.202	-0.04	1.06
-0.3	2		UWBM-109954	UWBM-109954-A	UWBM-109954-A28	8.519	0.1	1.08
-0.3	2		UWBM-109954	UWBM-109954-A	UWBM-109954-A29	8.836	0.06	1.11
-0.3	2		UWBM-109954	UWBM-109954-A	UWBM-109954-A30	9.153	0.25	1.27
-0.3	2		UWBM-109954	UWBM-109954-A	UWBM-109954-A31	9.47	0.31	1.07
-0.3	2		UWBM-109954	UWBM-109954-A	UWBM-109954-A32	9.787	0.13	1.01
-0.3	2		UWBM-109954	UWBM-109954-A	UWBM-109954-A33	10.104	0.27	0.64
-0.3	2		UWBM-109954	UWBM-109954-A	UWBM-109954-A34	10.421	0.12	1.18
-0.3	2		UWBM-109954	UWBM-109954-A	UWBM-109954-A35a	10.738	0.06	1.27	average of 2
-0.3	2		UWBM-109954	UWBM-109954-A	UWBM-109954-A36	11.055	-0.19	1.21
-0.3	2		UWBM-109954	UWBM-109954-A	UWBM-109954-A37	11.372			No sample collected
-0.3	2		UWBM-109954	UWBM-109954-A	UWBM-109954-A38	11.689	-0.33	1.3
-0.3	2		UWBM-109954	UWBM-109954-A	UWBM-109954-A39	12.006	-0.24	1.25
-0.3	2		UWBM-109954	UWBM-109954-A	UWBM-109954-A40	12.323	-0.08	1.16
-0.3	2		UWBM-109954	UWBM-109954-A	UWBM-109954-A41	12.64	-0.05	1.02
-0.3	2		UWBM-109954	UWBM-109954-A	UWBM-109954-A42	12.957	-0.1	1.21
-0.3	2		UWBM-109954	UWBM-109954-A	UWBM-109954-A43	13.274	0.09	1.11
-0.3	2		UWBM-109954	UWBM-109954-A	UWBM-109954-A44	13.591	0.13	1.14
-0.3	2		UWBM-109954	UWBM-109954-A	UWBM-109954-A45	13.908	0.16	1.14
-0.3	2		UWBM-109954	UWBM-109954-A	UWBM-109954-A46	14.225	0.07	0.95
-0.3	2		UWBM-109954	UWBM-109954-A	UWBM-109954-A47	14.542	0.31	0.99
-0.3	2		UWBM-109954	UWBM-109954-A	UWBM-109954-A48	14.859	0.16	1.15
-0.3	2		UWBM-109954	UWBM-109954-A	UWBM-109954-A49	15.176	0.07	1.21
-0.3	2		UWBM-109954	UWBM-109954-A	UWBM-109954-A50	15.493	-0.4	1.21
		UWBM-107343, Lahillia larseni
-4.2	2		UWBM-107343	UWBM-107343-A	107343-A01	0	-21.58	0.38
-4.2	2		UWBM-107343	UWBM-107343-A	107343-A02	0.321	-7.84	0.63
-4.2	2		UWBM-107343	UWBM-107343-A	107343-A03	0.642	-10.21	0.76
-4.2	2		UWBM-107343	UWBM-107343-A	107343-A04	0.963	-8.03	0.53
-4.2	2		UWBM-107343	UWBM-107343-A	107343-A05	1.284	-6.77	0.55
-4.2	2		UWBM-107343	UWBM-107343-A	107343-A06	1.605	-5.23	0.69
-4.2	2		UWBM-107343	UWBM-107343-A	107343-A07	1.926	-3.61	0.46
-4.2	2		UWBM-107343	UWBM-107343-A	107343-A08	2.247	-5.2	-0.39
-4.2	2		UWBM-107343	UWBM-107343-A	107343-A09	2.568	-3.12	0.33
-4.2	2		UWBM-107343	UWBM-107343-A	107343-A10	2.889	-2.59	0.16
-4.2	2		UWBM-107343	UWBM-107343-A	107343-A11	3.21	-3.97	0.12
-4.2	2		UWBM-107343	UWBM-107343-A	107343-A12a	3.531	-6.95	0.38	average of 2
-4.2	2		UWBM-107343	UWBM-107343-A	107343-A13	3.852	-4.89	0.14
-4.2	2		UWBM-107343	UWBM-107343-A	107343-A14	4.173	-8.33	0.5
-4.2	2		UWBM-107343	UWBM-107343-A	107343-A15	4.494	-7.36	0.16
-4.2	2		UWBM-107343	UWBM-107343-A	107343-A16	4.815	-5.93	0.16
-4.2	2		UWBM-107343	UWBM-107343-A	107343-A17	5.136	-5.37	0.46
-4.2	2		UWBM-107343	UWBM-107343-A	107343-A18	5.457	-3.04	0.5
-4.2	2		UWBM-107343	UWBM-107343-A	107343-A19	5.776	-4.79	0.43
-4.2	2		UWBM-107343	UWBM-107343-A	107343-A20	6.095	-4.17	0.29
-4.2	2		UWBM-107343	UWBM-107343-A	107343-A21	6.414	-3.15	0.47
-4.2	2		UWBM-107343	UWBM-107343-A	107343-A22a	6.733	-3.61	0.59	average of 2
-4.2	2		UWBM-107343	UWBM-107343-A	107343-A23	7.052	-2.48	0.3
-4.2	2		UWBM-107343	UWBM-107343-A	107343-A24a	7.371	-4.39	0.33	average of 2
-4.2	2		UWBM-107343	UWBM-107343-A	107343-A25	7.69	-3.78	0.03
-4.2	2		UWBM-107343	UWBM-107343-A	107343-A26a	8.009	-2.79	0.32	average of 3
-4.2	2		UWBM-107343	UWBM-107343-A	107343-A27	8.328	-2.59	0.08
-4.2	2		UWBM-107343	UWBM-107343-A	107343-A28	8.647	-3.46	0.42
-4.2	2		UWBM-107343	UWBM-107343-A	107343-A29	8.966	-4.38	-0.25
-4.2	2		UWBM-107343	UWBM-107343-A	107343-A30	9.285	-5.26	0.26
-4.2	2		UWBM-107343	UWBM-107343-A	107343-A31	9.605	-5.87	0.29
		UWBM-109951, Lahillia larseni
-35	0		UWBM-109951	UWBM-109951-A	UWBM-109951-A01a	0	-0.85	1.26	average of 3
-35	0		UWBM-109951	UWBM-109951-A	UWBM-109951-A02	0.315	-0.88	0.86
-35	0		UWBM-109951	UWBM-109951-A	UWBM-109951-A03	0.63	-1.23	1
-35	0		UWBM-109951	UWBM-109951-A	UWBM-109951-A04	0.945	-0.45	0.94
-35	0		UWBM-109951	UWBM-109951-A	UWBM-109951-A05	1.26	0.1	1
-35	0		UWBM-109951	UWBM-109951-A	UWBM-109951-A06	1.575	0	0.94
-35	0		UWBM-109951	UWBM-109951-A	UWBM-109951-A07	1.89	-0.02	0.9
-35	0		UWBM-109951	UWBM-109951-A	UWBM-109951-A08	2.205	-0.02	0.82
-35	0		UWBM-109951	UWBM-109951-A	UWBM-109951-A09	2.52	-0.29	0.63
-35	0		UWBM-109951	UWBM-109951-A	UWBM-109951-A10	2.835	-0.83	0.76
-35	0		UWBM-109951	UWBM-109951-A	UWBM-109951-A11	3.15	-1	1.04
-35	0		UWBM-109951	UWBM-109951-A	UWBM-109951-A13	3.78	-1.17	0.93
-35	0		UWBM-109951	UWBM-109951-A	UWBM-109951-A14	4.095	-1.19	0.97
-35	0		UWBM-109951	UWBM-109951-A	UWBM-109951-A15	4.41	-1.13	1.11
-35	0		UWBM-109951	UWBM-109951-A	UWBM-109951-A16	4.725	-1.02	0.88
-35	0		UWBM-109951	UWBM-109951-A	UWBM-109951-A17	5.04	-1.03	1.06
-35	0		UWBM-109951	UWBM-109951-A	UWBM-109951-A18	5.355	-1.1	0.95
-35	0		UWBM-109951	UWBM-109951-A	UWBM-109951-A19	5.67	-1.12	0.85
-35	0		UWBM-109951	UWBM-109951-A	UWBM-109951-A20	5.985	-1.08	1.11
-35	0		UWBM-109951	UWBM-109951-A	UWBM-109951-A21	6.3	-1.02	1.2
-35	0		UWBM-109951	UWBM-109951-A	UWBM-109951-A22a	6.615	-1.1	1.3	average of 3
-35	0		UWBM-109951	UWBM-109951-A	UWBM-109951-A23	6.93	-1.62	1.17
-35	0		UWBM-109951	UWBM-109951-A	UWBM-109951-A24	7.246	-1.2	1.04
-35	0		UWBM-109951	UWBM-109951-A	UWBM-109951-A25	7.562	-0.76	0.99
-35	0		UWBM-109951	UWBM-109951-A	UWBM-109951-A26	7.878	-0.65	1.1
-35	0		UWBM-109951	UWBM-109951-A	UWBM-109951-A27	8.194	-0.38	1.02
-35	0		UWBM-109951	UWBM-109951-A	UWBM-109951-A28	8.51	-0.12	0.68
-35	0		UWBM-109951	UWBM-109951-A	UWBM-109951-A29	8.826	0.05	1.02
-35	0		UWBM-109951	UWBM-109951-A	UWBM-109951-A30	9.142	-0.16	0.75
-35	0		UWBM-109951	UWBM-109951-A	UWBM-109951-A31	9.458	-0.43	0.48
-35	0		UWBM-109951	UWBM-109951-A	UWBM-109951-A32	9.774	-0.89	0.92
-35	0		UWBM-109951	UWBM-109951-A	UWBM-109951-A33	10.09	-1.2	0.69
-35	0		UWBM-109951	UWBM-109951-A	UWBM-109951-A34	10.406	-1.24	0.3
-35	0		UWBM-109951	UWBM-109951-A	UWBM-109951-A35a	10.722	-1.23	0.89	average of 2
-35	0		UWBM-109951	UWBM-109951-A	UWBM-109951-A36	11.038	-0.98	0.89
-35	0		UWBM-109951	UWBM-109951-A	UWBM-109951-A37	11.354	-1	0.78
-35	0		UWBM-109951	UWBM-109951-A	UWBM-109951-A38	11.67	-0.99	0.9
-35	0		UWBM-109951	UWBM-109951-A	UWBM-109951-A39	11.986	-0.77	0.81
-35	0		UWBM-109951	UWBM-109951-A	UWBM-109951-A40	12.302	-0.88	0.3
-35	0		UWBM-109951	UWBM-109951-A	UWBM-109951-A41	12.618	-0.93	0.73
-35	0		UWBM-109951	UWBM-109951-A	UWBM-109951-A42	12.934	-1.15	0.94
-35	0		UWBM-109951	UWBM-109951-A	UWBM-109951-A43	13.25	-0.69	1.05
-35	0		UWBM-109951	UWBM-109951-A	UWBM-109951-A44a	13.566	-1.12	1.07	average of 3
-35	0		UWBM-109951	UWBM-109951-A	UWBM-109951-A45a	13.882	-1.02	0.88	average of 2
-35	0		UWBM-109951	UWBM-109951-A	UWBM-109951-A46	14.198	-1.75	0.96
-35	0		UWBM-109951	UWBM-109951-A	UWBM-109951-A47	14.507	-2.17	0.76
-35	0		UWBM-109951	UWBM-109951-A	UWBM-109951-A48	14.816	-2.14	0.91
-35	0		UWBM-109951	UWBM-109951-A	UWBM-109951-A49	15.125	-1.91	0.97
-35	0		UWBM-109951	UWBM-109951-A	UWBM-109951-A50	15.434	-1.62	0.51
-35	0		UWBM-109951	UWBM-109951-A	UWBM-109951-A51	15.743	-1.63	0.72
-35	0		UWBM-109951	UWBM-109951-A	UWBM-109951-A52	16.052	-1.62	0.68
-35	0		UWBM-109951	UWBM-109951-A	UWBM-109951-A53	16.361	-1.42	-0.45
-35	0		UWBM-109951	UWBM-109951-A	UWBM-109951-A54	16.67	-1.22	0.76
-35	0		UWBM-109951	UWBM-109951-A	UWBM-109951-A55	16.979	-1.21	0.85
-35	0		UWBM-109951	UWBM-109951-A	UWBM-109951-A56	17.288	-1.11	0.82
-35	0		UWBM-109951	UWBM-109951-A	UWBM-109951-A57	17.597	-0.97	0.99
-35	0		UWBM-109951	UWBM-109951-A	UWBM-109951-A58	17.906	-0.94	0.99
-35	0		UWBM-109951	UWBM-109951-A	UWBM-109951-A59	18.215	-0.72	0.62
-35	0		UWBM-109951	UWBM-109951-A	UWBM-109951-A60	18.524	-0.07	1.16
-35	0		UWBM-109951	UWBM-109951-A	UWBM-109951-A61	18.833	-0.69	0.9
-35	0		UWBM-109951	UWBM-109951-A	UWBM-109951-A62	19.142	-1.4	1.16
-35	0		UWBM-109951	UWBM-109951-A	UWBM-109951-A63	19.451	-2.03	1.18
-35	0		UWBM-109951	UWBM-109951-A	UWBM-109951-A64a	19.76	-1.91	0.83	average of 3
-35	0		UWBM-109951	UWBM-109951-B	UWBM-109951-B01a	37.2	-3.39	0.23	average of 3
-35	0		UWBM-109951	UWBM-109951-B	UWBM-109951-B02	37.519	-2.71	0.53
-35	0		UWBM-109951	UWBM-109951-B	UWBM-109951-B03	37.838	-2.62	0.69
-35	0		UWBM-109951	UWBM-109951-B	UWBM-109951-B04	38.157	-2.37	0.75
-35	0		UWBM-109951	UWBM-109951-B	UWBM-109951-B05	38.476	-1.77	0.89
-35	0		UWBM-109951	UWBM-109951-B	UWBM-109951-B06	38.795	-1.7	0.84
-35	0		UWBM-109951	UWBM-109951-B	UWBM-109951-B07	39.114	-1.43	0.52
-35	0		UWBM-109951	UWBM-109951-B	UWBM-109951-B08	39.433	-1.89	0.46
-35	0		UWBM-109951	UWBM-109951-B	UWBM-109951-B09	39.752	-1.68	0.63
-35	0		UWBM-109951	UWBM-109951-B	UWBM-109951-B10	40.071	-0.76	0.7
-35	0		UWBM-109951	UWBM-109951-B	UWBM-109951-B11	40.39	-1	0.51
-35	0		UWBM-109951	UWBM-109951-B	UWBM-109951-B12	40.709	-1.31	0.62
-35	0		UWBM-109951	UWBM-109951-B	UWBM-109951-B13	41.028	-1.52	0.67
-35	0		UWBM-109951	UWBM-109951-B	UWBM-109951-B14	41.347	-1.69	0.84
-35	0		UWBM-109951	UWBM-109951-B	UWBM-109951-B15	41.666	-1.09	0.64
-35	0		UWBM-109951	UWBM-109951-B	UWBM-109951-B16	41.985	-0.76	0.69
-35	0		UWBM-109951	UWBM-109951-B	UWBM-109951-B17	42.304	-0.61	0.91
-35	0		UWBM-109951	UWBM-109951-B	UWBM-109951-B18	42.623	-0.76	0.59
-35	0		UWBM-109951	UWBM-109951-B	UWBM-109951-B19	42.942	-0.52	0.96
		UWBM-109952, Lahillia larseni
-35	0		UWBM-109952	UWBM-109952-A	UWBM-109952-A01	11.9	-0.64	0.85
-35	0		UWBM-109952	UWBM-109952-A	UWBM-109952-A02a	12.214	-0.28	0.9	average of 3
-35	0		UWBM-109952	UWBM-109952-A	UWBM-109952-A03	12.528	-0.31	1
-35	0		UWBM-109952	UWBM-109952-A	UWBM-109952-A04	12.842	-0.3	1.08
-35	0		UWBM-109952	UWBM-109952-A	UWBM-109952-A05	13.156	-0.25	0.69
-35	0		UWBM-109952	UWBM-109952-A	UWBM-109952-A06	13.47	-0.24	0.81
-35	0		UWBM-109952	UWBM-109952-A	UWBM-109952-A07	13.784	-0.23	1.02
-35	0		UWBM-109952	UWBM-109952-A	UWBM-109952-A08	14.098	-0.19	1.03
-35	0		UWBM-109952	UWBM-109952-A	UWBM-109952-A09	14.412	-0.18	0.82
-35	0		UWBM-109952	UWBM-109952-A	UWBM-109952-A10	14.726	-0.09	0.76
-35	0		UWBM-109952	UWBM-109952-A	UWBM-109952-A11	15.04	-0.24	0.92
-35	0		UWBM-109952	UWBM-109952-A	UWBM-109952-A12	15.354	-0.14	1.09
-35	0		UWBM-109952	UWBM-109952-A	UWBM-109952-A13	15.668	-0.25	1
-35	0		UWBM-109952	UWBM-109952-A	UWBM-109952-A14	15.982	-0.22	1.09
-35	0		UWBM-109952	UWBM-109952-A	UWBM-109952-A15	16.296	-0.12	1.11
-35	0		UWBM-109952	UWBM-109952-A	UWBM-109952-A16	16.61	-0.2	0.93
-35	0		UWBM-109952	UWBM-109952-A	UWBM-109952-A17	16.924	-0.09	1.12
-35	0		UWBM-109952	UWBM-109952-A	UWBM-109952-A18	17.238	-0.11	1.03
-35	0		UWBM-109952	UWBM-109952-A	UWBM-109952-A19	17.552	0.31	1.29
-35	0		UWBM-109952	UWBM-109952-A	UWBM-109952-A20	17.866	0.03	1.09
-35	0		UWBM-109952	UWBM-109952-A	UWBM-109952-A21	18.18	-0.57	0.98
-35	0		UWBM-109952	UWBM-109952-A	UWBM-109952-A22a	18.495	-0.18	0.96	average of 3
-35	0		UWBM-109952	UWBM-109952-A	UWBM-109952-A23	18.81	0.18	0.99
-35	0		UWBM-109952	UWBM-109952-A	UWBM-109952-A24	19.126	0.26	0.87
-35	0		UWBM-109952	UWBM-109952-A	UWBM-109952-A25	19.442	0.27	1.06
-35	0		UWBM-109952	UWBM-109952-A	UWBM-109952-A26	19.758	0.45	0.55
-35	0		UWBM-109952	UWBM-109952-A	UWBM-109952-A27	20.074	0.27	0.93
-35	0		UWBM-109952	UWBM-109952-A	UWBM-109952-A28	20.39	0.26	0.76
-35	0		UWBM-109952	UWBM-109952-A	UWBM-109952-A29	20.706	0.2	0.81
-35	0		UWBM-109952	UWBM-109952-A	UWBM-109952-A30	21.022			exetainer was cracked, sample gas lost
-35	0		UWBM-109952	UWBM-109952-A	UWBM-109952-A31	21.338	-0.08	0.94
-35	0		UWBM-109952	UWBM-109952-A	UWBM-109952-A32	21.654	0.19	0.88
-35	0		UWBM-109952	UWBM-109952-A	UWBM-109952-A33	21.97	0.21	0.65
-35	0		UWBM-109952	UWBM-109952-A	UWBM-109952-A34	22.286	0.32	0.95
-35	0		UWBM-109952	UWBM-109952-A	UWBM-109952-A35	22.602	0.45	0.76
-35	0		UWBM-109952	UWBM-109952-A	UWBM-109952-A36	22.918	0.35	0.79
-35	0		UWBM-109952	UWBM-109952-A	UWBM-109952-A37	23.234	0.19	0.84
-35	0		UWBM-109952	UWBM-109952-A	UWBM-109952-A38	23.55	0.24	0.69
-35	0		UWBM-109952	UWBM-109952-A	UWBM-109952-A39	23.866	0.22	0.86
-35	0		UWBM-109952	UWBM-109952-A	UWBM-109952-A40	24.182	-0.13	0.86
-35	0		UWBM-109952	UWBM-109952-A	UWBM-109952-A41	24.498	-0.61	1.1
-35	0		UWBM-109952	UWBM-109952-A	UWBM-109952-A42	24.812	0.2	1.19
-35	0		UWBM-109952	UWBM-109952-A	UWBM-109952-A43	25.126	0.33	0.98
-35	0		UWBM-109952	UWBM-109952-A	UWBM-109952-A44	25.44	0.03	1.07
-35	0		UWBM-109952	UWBM-109952-A	UWBM-109952-A45	25.754	0.25	1.24
-35	0		UWBM-109952	UWBM-109952-A	UWBM-109952-A46	26.068	0.17	1
-35	0		UWBM-109952	UWBM-109952-A	UWBM-109952-A47	26.382	0.34	1.14
-35	0		UWBM-109952	UWBM-109952-A	UWBM-109952-A48	26.696	0.44	1.08
-35	0		UWBM-109952	UWBM-109952-A	UWBM-109952-A49	27.01	0.43	0.95
-35	0		UWBM-109952	UWBM-109952-A	UWBM-109952-A50a	27.324	0.31	0.93	average of 2
-35	0		UWBM-109952	UWBM-109952-A	UWBM-109952-A51	27.638	0.28	0.91
-35	0		UWBM-109952	UWBM-109952-A	UWBM-109952-A52	27.952	0.17	1.01
-35	0		UWBM-109952	UWBM-109952-A	UWBM-109952-A53	28.266	0.2	0.86
-35	0		UWBM-109952	UWBM-109952-A	UWBM-109952-A54	28.58	0.05	0.95
-35	0		UWBM-109952	UWBM-109952-A	UWBM-109952-A55	28.894	-0.2	0.94
-35	0		UWBM-109952	UWBM-109952-A	UWBM-109952-A56a	29.208	-0.77	0.84	average of 2
-35	0		UWBM-109952	UWBM-109952-B	UWBM-109952-B01a	0	-0.1	1.14	average of 2
-35	0		UWBM-109952	UWBM-109952-B	UWBM-109952-B02a	0.537	-0.1	1.08	average of 4
-35	0		UWBM-109952	UWBM-109952-B	UWBM-109952-B03	1.074	-0.12	1.29
-35	0		UWBM-109952	UWBM-109952-B	UWBM-109952-B04	1.611	-0.13	0.93
-35	0		UWBM-109952	UWBM-109952-B	UWBM-109952-B05	1.933	-0.15	0.93
-35	0		UWBM-109952	UWBM-109952-B	UWBM-109952-B06	2.255	-0.14	1.14
-35	0		UWBM-109952	UWBM-109952-B	UWBM-109952-B07	2.577	-0.11	1.12
-35	0		UWBM-109952	UWBM-109952-B	UWBM-109952-B08	2.899	-0.11	0.98
-35	0		UWBM-109952	UWBM-109952-B	UWBM-109952-B09	3.221	-0.13	0.81
-35	0		UWBM-109952	UWBM-109952-B	UWBM-109952-B10	3.543	-0.02	1.06
-35	0		UWBM-109952	UWBM-109952-B	UWBM-109952-B11	3.865	0.03	1.12
-35	0		UWBM-109952	UWBM-109952-B	UWBM-109952-B12	4.187	0.05	1.1
-35	0		UWBM-109952	UWBM-109952-B	UWBM-109952-B13	4.509	0.07	0.88
-35	0		UWBM-109952	UWBM-109952-B	UWBM-109952-B14	4.831	0.14	0.83
-35	0		UWBM-109952	UWBM-109952-B	UWBM-109952-B15	5.153	0.25	0.89
-35	0		UWBM-109952	UWBM-109952-B	UWBM-109952-B16	5.475	0.32	1.21
-35	0		UWBM-109952	UWBM-109952-B	UWBM-109952-B17	5.797	0.26	0.75
-35	0		UWBM-109952	UWBM-109952-B	UWBM-109952-B18	6.119	0.14	1.02
-35	0		UWBM-109952	UWBM-109952-B	UWBM-109952-B19	6.441	0.23	1.27
-35	0		UWBM-109952	UWBM-109952-B	UWBM-109952-B20	6.763	0.08	1.21
-35	0		UWBM-109952	UWBM-109952-B	UWBM-109952-B21	7.085	-0.08	1.12
-35	0		UWBM-109952	UWBM-109952-B	UWBM-109952-B22	7.407	-0.36	1.33
-35	0		UWBM-109952	UWBM-109952-B	UWBM-109952-B23	7.729	-0.52	1.23
-35	0		UWBM-109952	UWBM-109952-B	UWBM-109952-B24	8.051	0.05	1.07
-35	0		UWBM-109952	UWBM-109952-C	UWBM-109952-C01	43.4	0.26	0.95
-35	0		UWBM-109952	UWBM-109952-C	UWBM-109952-C02	43.722	0.4	0.85
-35	0		UWBM-109952	UWBM-109952-C	UWBM-109952-C03a	44.044	0.2	0.9	average of 3
-35	0		UWBM-109952	UWBM-109952-C	UWBM-109952-C04	44.366	0.05	1.23
-35	0		UWBM-109952	UWBM-109952-C	UWBM-109952-C05	44.688	0.23	0.77
-35	0		UWBM-109952	UWBM-109952-C	UWBM-109952-C06	45.01	0.41	0.92
-35	0		UWBM-109952	UWBM-109952-C	UWBM-109952-C07	45.332	0.43	0.69
-35	0		UWBM-109952	UWBM-109952-C	UWBM-109952-C08	45.654	0.57	0.91
-35	0		UWBM-109952	UWBM-109952-C	UWBM-109952-C09	45.976	0.55	0.73
-35	0		UWBM-109952	UWBM-109952-C	UWBM-109952-C10	46.298	0.56	0.73
-35	0		UWBM-109952	UWBM-109952-C	UWBM-109952-C11	46.62	0.5	0.97
-35	0		UWBM-109952	UWBM-109952-C	UWBM-109952-C12	46.942	0.53	1.04
-35	0		UWBM-109952	UWBM-109952-C	UWBM-109952-C13	47.264	0.56	1.09
-35	0		UWBM-109952	UWBM-109952-C	UWBM-109952-C15	47.908	0.53	1.01
-35	0		UWBM-109952	UWBM-109952-C	UWBM-109952-C16	48.23	0.31	0.75
-35	0		UWBM-109952	UWBM-109952-C	UWBM-109952-C17	48.552	0.4	1.03
		UWBM-109953, Lahillia larseni
-35	0		UWBM-109953	UWBM-109953-A	UWBM-109953-A00	0	-0.39	1.27
-35	0		UWBM-109953	UWBM-109953-A	UWBM-109953-A01a	0.32	-0.32	1.22	average of 2
-35	0		UWBM-109953	UWBM-109953-A	UWBM-109953-A02	0.644	-0.27	1.24
-35	0		UWBM-109953	UWBM-109953-A	UWBM-109953-A03	0.968	-0.29	1.39
-35	0		UWBM-109953	UWBM-109953-A	UWBM-109953-A04	1.292	-0.38	1.26
-35	0		UWBM-109953	UWBM-109953-A	UWBM-109953-A05	1.616	-0.39	1.19
-35	0		UWBM-109953	UWBM-109953-A	UWBM-109953-A06	1.94	-0.26	1.15
-35	0		UWBM-109953	UWBM-109953-A	UWBM-109953-A07a	2.264	-0.19	1.24	average of 3
-35	0		UWBM-109953	UWBM-109953-A	UWBM-109953-A08	2.588	-0.12	1.14
-35	0		UWBM-109953	UWBM-109953-A	UWBM-109953-A09	2.912	-0.13	1.25
-35	0		UWBM-109953	UWBM-109953-A	UWBM-109953-A10	3.236	-0.12	1.12
-35	0		UWBM-109953	UWBM-109953-A	UWBM-109953-A11	3.56	0.1	1.32
-35	0		UWBM-109953	UWBM-109953-A	UWBM-109953-A12	3.884	0.12	1.37
-35	0		UWBM-109953	UWBM-109953-A	UWBM-109953-A13	4.208	0.11	1.26
-35	0		UWBM-109953	UWBM-109953-A	UWBM-109953-A14	4.532	-0.12	1.27
-35	0		UWBM-109953	UWBM-109953-A	UWBM-109953-A15	4.856	-0.59	1.46
-35	0		UWBM-109953	UWBM-109953-A	UWBM-109953-A16a	5.18	-0.36	1.2	average of 2
-35	0		UWBM-109953	UWBM-109953-A	UWBM-109953-A17a	5.494	-0.26	1.13	average of 2
-35	0		UWBM-109953	UWBM-109953-A	UWBM-109953-A18	5.808	0.03	1.3
-35	0		UWBM-109953	UWBM-109953-A	UWBM-109953-A19	6.122	0.08	0.89
-35	0		UWBM-109953	UWBM-109953-A	UWBM-109953-A20	6.436	0.11	1.25
-35	0		UWBM-109953	UWBM-109953-A	UWBM-109953-A21	6.75	0.04	1.23
-35	0		UWBM-109953	UWBM-109953-A	UWBM-109953-A22	7.064	-0.02	1.17
-35	0		UWBM-109953	UWBM-109953-A	UWBM-109953-A23	7.378	0.12	1.19
-35	0		UWBM-109953	UWBM-109953-A	UWBM-109953-A24	7.692	0.02	1.13
-35	0		UWBM-109953	UWBM-109953-A	UWBM-109953-A25	8.006	0.02	1.15
-35	0		UWBM-109953	UWBM-109953-A	UWBM-109953-A26	8.32	0.19	1.21
-35	0		UWBM-109953	UWBM-109953-A	UWBM-109953-A27	8.634	0.16	1.18
-35	0		UWBM-109953	UWBM-109953-A	UWBM-109953-A28	8.948	0.2	1.21
-35	0		UWBM-109953	UWBM-109953-A	UWBM-109953-A29	9.262	0.16	0.95
-35	0		UWBM-109953	UWBM-109953-A	UWBM-109953-A30	9.576	0.25	1.21
-35	0		UWBM-109953	UWBM-109953-A	UWBM-109953-A31	9.89	0.04	1.4
-35	0		UWBM-109953	UWBM-109953-A	UWBM-109953-A32	10.204	-0.83	1.39
-35	0		UWBM-109953	UWBM-109953-A	UWBM-109953-A33a	10.518	-0.2	1.23	average of 3
-35	0		UWBM-109953	UWBM-109953-A	UWBM-109953-A34	10.843	-0.06	1.22
-35	0		UWBM-109953	UWBM-109953-A	UWBM-109953-A35	11.168	0.08	1.29
-35	0		UWBM-109953	UWBM-109953-A	UWBM-109953-A36	11.493	0.16	1.2
-35	0		UWBM-109953	UWBM-109953-A	UWBM-109953-A37	11.818	0.2	1.19
-35	0		UWBM-109953	UWBM-109953-A	UWBM-109953-A38	12.143	0.31	1.15
-35	0		UWBM-109953	UWBM-109953-A	UWBM-109953-A39	12.468	0.38	1.27
-35	0		UWBM-109953	UWBM-109953-A	UWBM-109953-A40	12.793	0.41	1.3
-35	0		UWBM-109953	UWBM-109953-A	UWBM-109953-A41	13.118	0.28	1.23
-35	0		UWBM-109953	UWBM-109953-A	UWBM-109953-A42	13.443	0.42	1.27
-35	0		UWBM-109953	UWBM-109953-A	UWBM-109953-A43	13.768	0.32	0.79
-35	0		UWBM-109953	UWBM-109953-A	UWBM-109953-A44	14.093	0.34	1.22
-35	0		UWBM-109953	UWBM-109953-A	UWBM-109953-A45	14.418	0.18	1.33
-35	0		UWBM-109953	UWBM-109953-A	UWBM-109953-A46a	14.743	-0.52	1.38	average of 3
-35	0		UWBM-109953	UWBM-109953-A	UWBM-109953-A47	15.073	-0.44	1.23
-35	0		UWBM-109953	UWBM-109953-A	UWBM-109953-A48	15.403	-0.07	1.22
-35	0		UWBM-109953	UWBM-109953-A	UWBM-109953-A49	15.733	0.24	1.24
-35	0		UWBM-109953	UWBM-109953-A	UWBM-109953-A50	16.063	0.36	1.25
		UWBM-107335, Lahillia larseni
-91.1	0		UWBM-107335	UWBM-107335-A	107335-A01a	0	1.09	0.83	average of 2
-91.1	0		UWBM-107335	UWBM-107335-A	107335-A02	0.34	1.23	0.82
-91.1	0		UWBM-107335	UWBM-107335-A	107335-A03	0.714	1.28	0.92
-91.1	0		UWBM-107335	UWBM-107335-A	107335-A04a	1.124	1.27	0.96	average of 3
-91.1	0		UWBM-107335	UWBM-107335-A	107335-A05	1.534	1.39	0.9
-91.1	0		UWBM-107335	UWBM-107335-A	107335-A06	1.944	1.44	1
-91.1	0		UWBM-107335	UWBM-107335-A	107335-A07	2.354	1.39	0.94
-91.1	0		UWBM-107335	UWBM-107335-A	107335-A08	2.764	1.39	0.64
-91.1	0		UWBM-107335	UWBM-107335-A	107335-A09	3.174	1.34	0.52
-91.1	0		UWBM-107335	UWBM-107335-A	107335-A10	3.584	1.52	0.77
-91.1	0		UWBM-107335	UWBM-107335-A	107335-A11	3.994	1.56	0.67
-91.1	0		UWBM-107335	UWBM-107335-A	107335-A12	4.404	1.59	0.74
-91.1	0		UWBM-107335	UWBM-107335-A	107335-A13	4.814	1.68	0.92
-91.1	0		UWBM-107335	UWBM-107335-A	107335-A14	5.224	1.6	0.74
-91.1	0		UWBM-107335	UWBM-107335-A	107335-A15	5.634	1.63	0.76
-91.1	0		UWBM-107335	UWBM-107335-A	107335-A16	6.044	1.62	-0.6
-91.1	0		UWBM-107335	UWBM-107335-A	107335-A17	6.454	1.59	0.86
-91.1	0		UWBM-107335	UWBM-107335-A	107335-A18	6.864	1.69	0.84
-91.1	0		UWBM-107335	UWBM-107335-A	107335-A19	7.274	1.74	0.73
-91.1	0		UWBM-107335	UWBM-107335-A	107335-A20	7.684	1.64	0.79
-91.1	0		UWBM-107335	UWBM-107335-A	107335-A21	8.094	1.49	0.92
-91.1	0		UWBM-107335	UWBM-107335-A	107335-A22	8.504	1.35	0.89
-91.1	0		UWBM-107335	UWBM-107335-A	107335-A23	8.914	0.79	1
-91.1	0		UWBM-107335	UWBM-107335-A	107335-A24a	9.324	0.74	1.04	average of 3
-91.1	0		UWBM-107335	UWBM-107335-A	107335-A25	9.734	1.25	0.91
-91.1	0		UWBM-107335	UWBM-107335-A	107335-A26	10.144	1.23	0.9
-91.1	0		UWBM-107335	UWBM-107335-A	107335-A27a	10.554	1.22	0.85	average of 2
-91.1	0		UWBM-107335	UWBM-107335-A	107335-A28	10.874	1.05	0.78
-91.1	0		UWBM-107335	UWBM-107335-A	107335-A29	11.194	1.24	0.83
-91.1	0		UWBM-107335	UWBM-107335-A	107335-A30	11.514	1.3	0.82
-91.1	0		UWBM-107335	UWBM-107335-A	107335-A31	11.834	1.38	0.91
-91.1	0		UWBM-107335	UWBM-107335-A	107335-A32	12.154	1.29	0.98
-91.1	0		UWBM-107335	UWBM-107335-A	107335-A33	12.474	1.31	0.65
-91.1	0		UWBM-107335	UWBM-107335-A	107335-A34	12.794	1.47	0.8
-91.1	0		UWBM-107335	UWBM-107335-A	107335-A35	13.114	1.39	0.41
-91.1	0		UWBM-107335	UWBM-107335-A	107335-A36a	13.434	1.44	0.95	average of 3
-91.1	0		UWBM-107335	UWBM-107335-A	107335-A37	13.754	1.47	0.72
-91.1	0		UWBM-107335	UWBM-107335-A	107335-A38	14.074	1.48	0.79
-91.1	0		UWBM-107335	UWBM-107335-A	107335-A39	14.394	1.45	0.88
-91.1	0		UWBM-107335	UWBM-107335-A	107335-A40	14.714	1.47	1.01
-91.1	0		UWBM-107335	UWBM-107335-A	107335-A41	15.034	1.49	0.97
-91.1	0		UWBM-107335	UWBM-107335-A	107335-A42	15.354	1.44	0.76
-91.1	0		UWBM-107335	UWBM-107335-A	107335-A43	15.674	1.39	0.9
-91.1	0		UWBM-107335	UWBM-107335-A	107335-A44	15.994	1.23	0.8
-91.1	0		UWBM-107335	UWBM-107335-A	107335-A45	16.314	1.08	0.7
-91.1	0		UWBM-107335	UWBM-107335-A	107335-A46a	16.634	0.15	0.86	average of 3
-91.1	0		UWBM-107335	UWBM-107335-A	107335-A47a	16.952	1.1	0.94	average of 3
-91.1	0		UWBM-107335	UWBM-107335-A	107335-A48	17.27	1.24	0.46
-91.1	0		UWBM-107335	UWBM-107335-A	107335-A49	17.588	1.24	0.71
-91.1	0		UWBM-107335	UWBM-107335-A	107335-A50	17.906	1.26	0.69
-91.1	0		UWBM-107335	UWBM-107335-A	107335-A51	18.224	1.28	0.73
-91.1	0		UWBM-107335	UWBM-107335-A	107335-A52	18.542	1.3	-1.29
-91.1	0		UWBM-107335	UWBM-107335-A	107335-A53a	18.86	1.39	0.83	average of 2
-91.1	0		UWBM-107335	UWBM-107335-A	107335-A54	19.178	1.15	0.65
-91.1	0		UWBM-107335	UWBM-107335-A	107335-A55	19.496	1.56	0.89
-91.1	0		UWBM-107335	UWBM-107335-A	107335-A56	19.814	1.34	0.76
-91.1	0		UWBM-107335	UWBM-107335-A	107335-A57	20.132	1.55	1.05
-91.1	0		UWBM-107335	UWBM-107335-A	107335-A58	20.45	1.23	0.98
-91.1	0		UWBM-107335	UWBM-107335-A	107335-A59	20.768	1.01	0.88
-91.1	0		UWBM-107335	UWBM-107335-A	107335-A60	21.086	1.26	0.9
-91.1	0		UWBM-107335	UWBM-107335-A	107335-A61	21.406	0.7	0.97
-91.1	0		UWBM-107335	UWBM-107335-A	107335-A62	21.726	1.1	0.83
		D-L1430A1, Lahillia larseni
40	0		D-L1430A1	D-L1430A1	1-G75	0	2.28	1.39
40	0		D-L1430A1	D-L1430A1	2-G75	0.114	2.29	1.54
40	0		D-L1430A1	D-L1430A1	3-G75	0.228	2.5	1.27
40	0		D-L1430A1	D-L1430A1	4-G75	0.342	2.44	1.23
40	0		D-L1430A1	D-L1430A1	5-G75	0.456	2.13	1.69
40	0		D-L1430A1	D-L1430A1	6-G75	0.57	2.37	1.37
40	0		D-L1430A1	D-L1430A1	7-G75	0.684	2.87	1.2
40	0		D-L1430A1	D-L1430A1	8-G75	0.798	3.04	1.29
40	0		D-L1430A1	D-L1430A1	9-G75	0.912	2.75	1.25
40	0		D-L1430A1	D-L1430A1	10-G75	1.026	2.68	1.33
40	0		D-L1430A1	D-L1430A1	11-G75	1.14	2.47	1.44
40	0		D-L1430A1	D-L1430A1	12-G75	1.254	2.02	1.13
40	0		D-L1430A1	D-L1430A1	13-G75	1.368	2.14	1.16
40	0		D-L1430A1	D-L1430A1	14-G75	1.472	2.49	0.97
40	0		D-L1430A1	D-L1430A1	15-G75	1.576	2.75	1.33
40	0		D-L1430A1	D-L1430A1	16-G75	1.68	2.71	1.36
40	0		D-L1430A1	D-L1430A1	17-G75	1.784	2.44	1.34
40	0		D-L1430A1	D-L1430A1	18-G75	1.888	2.28	1.39
40	0		D-L1430A1	D-L1430A1	19-G75	1.992	2.14	1.69
40	0		D-L1430A1	D-L1430A1	20-G75	2.096	2.12	1.43
40	0		D-L1430A1	D-L1430A1	21-G75	2.201	2.32	1.32
40	0		D-L1430A1	D-L1430A1	22-G75	2.306	2.45	1.43
40	0		D-L1430A1	D-L1430A1	23-G75	2.411	2.34	1.34
40	0		D-L1430A1	D-L1430A1	24-G75	2.516	2.06	1.52
40	0		D-L1430A1	D-L1430A1	25-G75	2.621	2.28	1.62
		D-1529A, Lahillia larseni
1	2		D-1529A	D-1529A	1-G70	0	-1.77	0.62
1	2		D-1529A	D-1529A	2-G70	0.058	-1.9	0.16
1	2		D-1529A	D-1529A	3-G70	0.116	-2.35	0.2
1	2		D-1529A	D-1529A	4-G70	0.174	-2.65	0.12
1	2		D-1529A	D-1529A	5-G70	0.232	-3.03	0.13
1	2		D-1529A	D-1529A	6-G70	0.29	-2.81	-0.27
1	2		D-1529A	D-1529A	7-G70	0.351	-3.31	-0.06
1	2		D-1529A	D-1529A	8-G70	0.412	-3.6	0.07
1	2		D-1529A	D-1529A	9-G70	0.473	-3.58	-0.11
1	2		D-1529A	D-1529A	10-G70	0.534	-3	0.43
1	2		D-1529A	D-1529A	11-G70	0.595	-3.84	-0.37
1	2		D-1529A	D-1529A	12-G70	0.65	-3	0.26
1	2		D-1529A	D-1529A	13-G70	0.705	-2.2	0.6
1	2		D-1529A	D-1529A	14-G70	0.76	-2.46	0.57
1	2		D-1529A	D-1529A	15-G70	0.815	-2.43	0.4
1	2		D-1529A	D-1529A	16-G70	0.87	-2.91	0.38
1	2		D-1529A	D-1529A	17-G70	0.927	-2.83	0.48
1	2		D-1529A	D-1529A	18-G70	0.984	-3.11	0.49
1	2		D-1529A	D-1529A	19-G70	1.041	-3.78	0.35
1	2		D-1529A	D-1529A	20-G70	1.098	-3.28	0.29
1	2		D-1529A	D-1529A	22-G70	1.155	-3.04	0.32
1	2		D-1529A	D-1529A	23-G70	1.212	-3.23	0.43
1	2		D-1529A	D-1529A	24-G70	1.269	-2.96	0.62
1	2		D-1529A	D-1529A	25-G70	1.326	-2.72	0.72
1	2		D-1529A	D-1529A	26-G70	1.383	-2.92	0.48
1	2		D-1529A	D-1529A	27-G70	1.44	-3.1	0.59
1	2		D-1529A	D-1529A	28-G70	1.497	-3.49	0.49
1	2		D-1529A	D-1529A	29-G70	1.554	-3.14	0.5
1	2		D-1529A	D-1529A	30-G70	1.611	-3.47	0.68
1	2		D-1529A	D-1529A	31-G70	1.668	-3.35	0.56
1	2		D-1529A	D-1529A	32-G70	1.725	-2.51	0.56
1	2		D-1529A	D-1529A	33-G70	1.782	-2.43	0.54
1	2		D-1529A	D-1529A	34-G70	1.839	-2.74	0.47
1	2		D-1529A	D-1529A	35-G70	1.896	-2.74	0.53
1	2		D-1529A	D-1529A	36-G70	1.953	-3.18	0.54
1	2		D-1529A	D-1529A	37-G70	2.01	-3.99	0.44
1	2		D-1529A	D-1529A	38-G70	2.067	-3.57	0.33
1	2		D-1529A	D-1529A	39-G70	2.124	-3.69	0.43
1	2		D-1529A	D-1529A	40-G70	2.181	-3.63	0.38
		D-L1480B, Lahillia larseni
-85	0		D-L1480B	D-L1480B	1-G74	0	0.68	1.55
-85	0		D-L1480B	D-L1480B	2-G74	0.111	0.87	1.48
-85	0		D-L1480B	D-L1480B	3-G74	0.222	0.66	1.34
-85	0		D-L1480B	D-L1480B	4-G74	0.333	0.63	1.46
-85	0		D-L1480B	D-L1480B	5-G74	0.444	0.62	1.51
-85	0		D-L1480B	D-L1480B	6-G74	0.555	0.95	1.35
-85	0		D-L1480B	D-L1480B	7-G74	0.67	0.7	1.21
-85	0		D-L1480B	D-L1480B	8-G74	0.785	0.56	1.04
-85	0		D-L1480B	D-L1480B	9-G74	0.9	0.44	1.08
-85	0		D-L1480B	D-L1480B	10-G74	1.015	0.43	1.32
-85	0		D-L1480B	D-L1480B	11-G74	1.13	0.16	1.17
-85	0		D-L1480B	D-L1480B	12-G74	1.245	0.11	1.19
-85	0		D-L1480B	D-L1480B	13-G74	1.36	0.77	1.34
-85	0		D-L1480B	D-L1480B	14-G74	1.464	0.94	1.15
-85	0		D-L1480B	D-L1480B	15-G74	1.568	1.23	1.08
-85	0		D-L1480B	D-L1480B	16-G74	1.672	0.7	1.15
-85	0		D-L1480B	D-L1480B	17-G74	1.776	0.05	0.94
-85	0		D-L1480B	D-L1480B	18-G74	1.88	-0.24	0.92
-85	0		D-L1480B	D-L1480B	19-G74	1.984	-0.31	1.14
-85	0		D-L1480B	D-L1480B	20-G74	2.098	0.29	1.58
-85	0		D-L1480B	D-L1480B	21-G74	2.212	0.15	1.03
-85	0		D-L1480B	D-L1480B	22-G74	2.326	-0.21	0.79
-85	0		D-L1480B	D-L1480B	23-G74	2.44	-0.46	0.89
-85	0		D-L1480B	D-L1480B	24-G74	2.554	-0.16	1.23
-85	0		D-L1480B	D-L1480B	25-G74	2.668	0.16	1.18
-85	0		D-L1480B	D-L1480B	26-G74	2.782	0.43	1.1
-85	0		D-L1480B	D-L1480B	27-G74	2.896	0.29	1.14
-85	0		D-L1480B	D-L1480B	28-G74	3.01	-0.12	0.87
-85	0		D-L1480B	D-L1480B	29-G74	3.124	-0.27	0.87
-85	0		D-L1480B	D-L1480B	30-G74	3.238	-0.41	0.78
-85	0		D-L1480B	D-L1480B	31-G74	3.352	-0.47	0.82
-85	0		D-L1480B	D-L1480B	32-G74	3.466	-0.54	0.86
-85	0		D-L1480B	D-L1480B	33-G74	3.58	-0.61	1.04
-85	0		D-L1480B	D-L1480B	34-G74	3.694	-0.66	0.9
-85	0		D-L1480B	D-L1480B	35-G74	3.808	-0.34	1.21
		D-L1480E, Lahillia larseni
-85	0		D-L1480E	D-L1480E	1-G70	0	-1.52	0.63
-85	0		D-L1480E	D-L1480E	2-G70	0.115	-1.39	0.7
-85	0		D-L1480E	D-L1480E	3-G70	0.23	-1.17	0.71
-85	0		D-L1480E	D-L1480E	4-G70	0.345	-1.05	0.77
-85	0		D-L1480E	D-L1480E	5-G70	0.46	-1.21	0.87
-85	0		D-L1480E	D-L1480E	6-G70	0.56	-1.58	0.66
-85	0		D-L1480E	D-L1480E	7-G70	0.66	-1.72	0.58
-85	0		D-L1480E	D-L1480E	8-G70	0.76	-1.28	0.7
-85	0		D-L1480E	D-L1480E	9-G70	0.86	-0.49	0.91
-85	0		D-L1480E	D-L1480E	10-G70	0.96	-0.94	1.06
-85	0		D-L1480E	D-L1480E	11-G70	1.063	-1.67	0.89
-85	0		D-L1480E	D-L1480E	12-G70	1.166	-1.66	0.78
-85	0		D-L1480E	D-L1480E	13-G70	1.269	-1.08	0.87
-85	0		D-L1480E	D-L1480E	14-G70	1.372	-1.31	1.01
-85	0		D-L1480E	D-L1480E	15-G70	1.466	-1.65	0.75
-85	0		D-L1480E	D-L1480E	16-G70	1.56	-1.46	0.87
-85	0		D-L1480E	D-L1480E	17-G70	1.654	-0.88	0.99
-85	0		D-L1480E	D-L1480E	18-G70	1.748	-1.25	1.11
-85	0		D-L1480E	D-L1480E	19-G70	1.853	-1.45	0.75
-85	0		D-L1480E	D-L1480E	20-G70	1.958	-1.03	0.79
-85	0		D-L1480E	D-L1480E	21-G70	2.063	-0.83	1.34
		D-L757b, Lahillia larseni
-133	0		D-L757b	D-L757b-Pris	12-G84	0	1.32	2.18
-133	0		D-L757b	D-L757b-Pris	13-G84	0.1	0.55	1.55
-133	0		D-L757b	D-L757b-Pris	14-G84	0.2	0.03	1.94
-133	0		D-L757b	D-L757b-Pris	15-G84	0.3	0.05	1.9
-133	0		D-L757b	D-L757b-Pris	16-G84	0.4	0.15	1.79
-133	0		D-L757b	D-L757b-Pris	17-G84	0.5	0.29	1.69
-133	0		D-L757b	D-L757b-Pris	18-G84	0.6	0.53	1.62
-133	0		D-L757b	D-L757b-Pris	19-G84	0.7	0.64	1.65
-133	0		D-L757b	D-L757b-Pris	20-G84	0.8	0.71	1.78
-133	0		D-L757b	D-L757b-Pris	21-G84	0.9	0.84	1.71
-133	0		D-L757b	D-L757b-Pris	22-G84	1	1.08	1.64
-133	0		D-L757b	D-L757b-Pris	23-G84	1.1	1.24	1.6
-133	0		D-L757b	D-L757b-Pris	24-G84	1.2	1.23	1.48
-133	0		D-L757b	D-L757b-Pris	25-G84	1.3	1.41	1.59
-133	0		D-L757b	D-L757b-Pris	26-G84	1.4	1.4	1.76
-133	0		D-L757b	D-L757b-Pris	27-G84	1.5	-0.19	2.02
-133	0		D-L757b	D-L757b-Pris	28-G84	1.604	-0.19	1.93
-133	0		D-L757b	D-L757b-Pris	29-G84	1.708	0.1	1.76
-133	0		D-L757b	D-L757b-Pris	30-G84	1.812	0.2	1.8
-133	0		D-L757b	D-L757b-Pris	31-G84	1.926	0.34	1.64
-133	0		D-L757b	D-L757b-Pris	32-G84	2.04	0.52	1.6
-133	0		D-L757b	D-L757b-Pris	33-G84	2.154	0.58	1.59
-133	0		D-L757b	D-L757b-Pris	34-G84	2.268	0.64	1.65
-133	0		D-L757b	D-L757b-Pris	35-G84	2.382	0.68	1.65
-133	0		D-L757b	D-L757b-Pris	36-G84	2.496	0.78	1.72
-133	0		D-L757b	D-L757b-Pris	37-G84	2.61	1.03	1.67
-133	0		D-L757b	D-L757b-Pris	38-G84	2.724	1	1.87
-133	0		D-L757b	D-L757b-Pris	1-G60	2.844	-0.03	1.88
-133	0		D-L757b	D-L757b-Pris	2-G60	2.964	0.14	1.86
-133	0		D-L757b	D-L757b-Pris	3-G60	3.084	0.2	1.68
-133	0		D-L757b	D-L757b-Pris	4-G60	3.204	0.36	1.73
-133	0		D-L757b	D-L757b-Pris	5-G60	3.324	0.34	1.69
-133	0		D-L757b	D-L757b-Pris	6-G60	3.444	0.4	1.78
-133	0		D-L757b	D-L757b-Pris	7-G60	3.564	0.24	1.66
-133	0		D-L757b	D-L757b-Pris	8-G60	3.674	0.42	1.69
-133	0		D-L757b	D-L757b-Pris	9-G60	3.784	0.49	1.63
-133	0		D-L757b	D-L757b-Pris	10-G60	3.894	0.57	1.64
-133	0		D-L757b	D-L757b-Pris	11-G60	4.004	0.59	1.66
-133	0		D-L757b	D-L757b-Pris	12-G60	4.114	0.67	1.75
-133	0		D-L757b	D-L757b-Pris	13-G60	4.224	0.68	1.65
-133	0		D-L757b	D-L757b-Pris	14-G60	4.334	0.78	1.68
-133	0		D-L757b	D-L757b-Pris	15-G60	4.444	0.82	1.61
-133	0		D-L757b	D-L757b-Pris	16-G60	4.554	0.8	1.67
-133	0		D-L757b	D-L757b-Pris	17-G60	4.667	0.39	2.1
-133	0		D-L757b	D-L757b-Pris	18-G60	4.78	-0.18	1.78
-133	0		D-L757b	D-L757b-Pris	19-G60	4.893	-0.27	1.61
-133	0		D-L757b	D-L757b-Pris	20-G60	5.006	-0.04	1.68
-133	0		D-L757b	D-L757b-Pris	21-G60	5.119	0.13	1.6
-133	0		D-L757b	D-L757b-Pris	22-G60	5.232	0.32	1.67
-133	0		D-L757b	D-L757b-Pris	23-G60	5.345	0.38	1.67
-133	0		D-L757b	D-L757b-Pris	24-G60	5.455	0.4	1.61
-133	0		D-L757b	D-L757b-Pris	25-G60	5.565	0.48	1.72
-133	0		D-L757b	D-L757b-Pris	26-G60	5.675	0.48	1.63
-133	0		D-L757b	D-L757b-Pris	27-G60	5.785	0.56	1.66
-133	0		D-L757b	D-L757b-Pris	28-G60	5.895	0.7	1.71
-133	0		D-L757b	D-L757b-Pris	29-G60	6.005	0.83	1.6
-133	0		D-L757b	D-L757b-Pris	30-G60	6.115	1.02	1.7
-133	0		D-L757b	D-L757b-Pris	31-G60	6.225	1.1	1.68
-133	0		D-L757b	D-L757b-Hinge	1-G84	0	1.46	2.12
-133	0		D-L757b	D-L757b-Hinge	2-G84	0.105	1.64	2.1
-133	0		D-L757b	D-L757b-Hinge	3-G84	0.21	1.53	2.36
-133	0		D-L757b	D-L757b-Hinge	4-G84	0.315	1.5	2.3
-133	0		D-L757b	D-L757b-Hinge	5-G84	0.42	1.64	2.49
-133	0		D-L757b	D-L757b-Hinge	6-G84	0.525	1.39	2.28
-133	0		D-L757b	D-L757b-Hinge	7-G84	0.63	1.47	2.37
-133	0		D-L757b	D-L757b-Hinge	8-G84	0.735	1.45	2.3
-133	0		D-L757b	D-L757b-Hinge	9-G84	0.84	1.38	2.43
-133	0		D-L757b	D-L757b-Hinge	10-G84	0.945	1.29	2.33
-133	0		D-L757b	D-L757b-Hinge	11-G84	1.05	1.32	2.34

## Sheet: S4. Low-Res Sampling data
Supplementary Data Table S4: Stable isotope data from Lahillia larseni shells sampled at low resolution
Description: Stable carbon and oxygen isotope data from the sampling of Lahillia larseni shells at low resolution. Includes the stratigraphic height (m) of each sampled shell relative to the K-Pg boundary, the interval in which the shell occurs (2 for shells occurring in our "interval II" as designated in the mansucript, and 0 for shells falling outside our intervals I or II), and the distance (m…
Stratigraphic height of shell, relative to the K-Pg boundary (m)	Interval	Shell	Shell ID	Sampling Sequence ID	Sample Name	Sample distance from umbo (mm)	δ13C (‰VPDB)	δ18O (‰VPDB)	Notes
		UWBM-109963, Lahillia larseni
56.6	0		UWBM-109963	UWBM-109963-S	UWBM-109963-S1		1.14	0.888546
56.6	0		UWBM-109963	UWBM-109963-S	UWBM-109963-S2		0.59	0.758591
56.6	0		UWBM-109963	UWBM-109963-S	UWBM-109963-S3		0.54	0.828567
		UWBM-109960, Lahillia larseni
35.4	0		UWBM-109960	UWBM-109960-S	UWBM-109960-S1		1.49	-0.0411365
35.4	0		UWBM-109960	UWBM-109960-S	UWBM-109960-S2		0.83	-0.0611297
35.4	0		UWBM-109960	UWBM-109960-S	UWBM-109960-S3		1.26	0.128806
		UWBM-109961, Lahillia larseni
35.4	0		UWBM-109961	UWBM-109961-S	UWBM-109961-S1		1.4	0.598645
35.4	0		UWBM-109961	UWBM-109961-S	UWBM-109961-S2a		1.475	0.618638	average of 2
35.4	0		UWBM-109961	UWBM-109961-S	UWBM-109961-S3		1.06	0.188785
		UWBM-109959, Lahillia larseni
26.4	2		UWBM-109959	UWBM-109959-S	UWBM-109959-S1		0.07	-0.101116
26.4	2		UWBM-109959	UWBM-109959-S	UWBM-109959-S2				bad exetainer
26.4	2		UWBM-109959	UWBM-109959-S	UWBM-109959-S2.5		-12.99	0.218775
26.4	2		UWBM-109959	UWBM-109959-S	UWBM-109959-S3		-0.52	0.288751
		UWBM-109956, Lahillia larseni
1.5	2		UWBM-109956	UWBM-109956-S	UWBM-109956-S1		0.13	0.248765
1.5	2		UWBM-109956	UWBM-109956-S	UWBM-109956-S2		0.31	0.538666
1.5	2		UWBM-109956	UWBM-109956-S	UWBM-109956-S3		0.3	0.518673
1.5	2		UWBM-109956	UWBM-109956-S	UWBM-109956-S4		1.18	0.628635
		UWBM-107332, Lahillia larseni
-1.6	2		UWBM-107332	UWBM-107332-S	107332-S1		0.32	1.24842
-1.6	2		UWBM-107332	UWBM-107332-S	107332-S2		-2.2	0.718604
-1.6	2		UWBM-107332	UWBM-107332-S	107332-S2.5		-11.32	0.938529
-1.6	2		UWBM-107332	UWBM-107332-S	107332-S3		-9.11	0.768587
-1.6	2		UWBM-107332	UWBM-107332-S	107332-S3-2		-10.65	1.20844
-1.6	2		UWBM-107332	UWBM-107332-S	107332-S4		-5.47	1.13846
		UWBM-107339, Lahillia larseni
-87.6	0		UWBM-107339	UWBM-107339-S	107339-S1		0.17	0.648628
-87.6	0		UWBM-107339	UWBM-107339-S	107339-S2				bad exetainer
-87.6	0		UWBM-107339	UWBM-107339-S	107339-S3		1.56	0.608642
-87.6	0		UWBM-107339	UWBM-107339-S	107339-S4		1.74	0.488683
		L1161, Lahillia larseni
-7	0		L1161	L1161	MR 1	4	3.41	1.56
-7	0		L1161	L1161	MR 16	68	2.14	1
-7	0		L1161	L1161	MR 19	79	1.02	1.16
-7	0		L1161	L1161	MR 22	89	0.84	0.92
-7	0		L1161	L1161	MR 25	100	1.09	1.25
-7	0		L1161	L1161	MR 4	9	2.92	1.11
-7	0		L1161	L1161	MR 7	27	2.79	1.17
		L1474A, Lahillia larseni
-42	0		L1474A	L1474A	MR 10	40	3.18	2.03
-42	0		L1474A	L1474A	MR 27	27	-0.26	0.99
-42	0		L1474A	L1474A	MR 1	2	3.41	1.9
-42	0		L1474A	L1474A	MR 13	26	2.54	1.66
-42	0		L1474A	L1474A	MR 16	55	2.3	1.53
-42	0		L1474A	L1474A	MR 19	73	1.09	1.24
-42	0		L1474A	L1474A	MR 2	5	3.19	1.73
-42	0		L1474A	L1474A	MR 22	81	0.94	0.83
-42	0		L1474A	L1474A	MR 25	86	0.76	1
-42	0		L1474A	L1474A	MR 4	10	3.31	1.74
-42	0		L1474A	L1474A	MR 7	16	3.27	1.45
		L1609, Lahillia larseni
-171	0		L1609	L1609	MR 1	3	2.32	1.42
-171	0		L1609	L1609	MR 12	38	1.09	0.95
-171	0		L1609	L1609	MR 15	51	-0.6	0.93
-171	0		L1609	L1609	MR 18	60	-0.03	0.98
-171	0		L1609	L1609	MR 2	6	2.6	1.13
-171	0		L1609	L1609	MR 21	70	-0.28	0.77
-171	0		L1609	L1609	MR 23	77	-0.71	0.58
-171	0		L1609	L1609	MR 26	87	-0.42	0.97
-171	0		L1609	L1609	MR 3	9	2.63	1.22
-171	0		L1609	L1609	MR 4	13	2.48	0.81
-171	0		L1609	L1609	MR 6	20	2.59	1.28
-171	0		L1609	L1609	MR 9	29	1.76	1.15
		L447D, Lahillia larseni
0	2		L447D	L447D	MR 1	7	0.59	1.6
0	2		L447D	L447D	MR 16	58	-0.72	1.24
0	2		L447D	L447D	MR 19	69	-1.4	1.05
0	2		L447D	L447D	MR 2	10	1.18	1.53
0	2		L447D	L447D	MR 22	78	-0.86	0.96
0	2		L447D	L447D	MR 25	90	-2.52	1.1
0	2		L447D	L447D	MR 28	100	-4.02	1.11
0	2		L447D	L447D	MR 31	110	-1.31	1.25
0	2		L447D	L447D	MR 4	20	1.47	1.4
0	2		L447D	L447D	MR 7	29	1.84	1.23
		L776A, Lahillia larseni
-233	0		L776A	L776A	MR 11	33	1.17	1.38
-233	0		L776A	L776A	MR 2	5	2.66	1.59
-233	0		L776A	L776A	MR 4	12	2.725	1.56
-233	0		L776A	L776A	MR 6	18	2.79	1.79
-233	0		L776A	L776A	MR 8	24	2.41	1.67
-233	0		L776A	L776A	MR 1	2	2.58	1.42
-233	0		L776A	L776A	MR 1	2	2.74	1.79
-233	0		L776A	L776A	MR 11	33	1.36	1.26
-233	0		L776A	L776A	MR 14	43	-0.41	1
-233	0		L776A	L776A	MR 14	43	-0.24	1.25
-233	0		L776A	L776A	MR 17	54	-1.09	1.25
-233	0		L776A	L776A	MR 17	54	-0.87	1.02
-233	0		L776A	L776A	MR 2	5	2.63	1.44
-233	0		L776A	L776A	MR 20	67	-1.6	0.75
-233	0		L776A	L776A	MR 20	67	-1.37	1.2
-233	0		L776A	L776A	MR 23	75	-0.64	1.1
-233	0		L776A	L776A	MR 23	75	-0.62	1.01
-233	0		L776A	L776A	MR 25	80	-1.52	1
-233	0		L776A	L776A	MR 25	80	-0.9	0.79
-233	0		L776A	L776A	MR 3	8	2.08	1.42
-233	0		L776A	L776A	MR 3	8	2.31	1.55

## Sheet: G47758
Mohr, R.C., Tobin, T.S., Petersen, S.V., Dutton, A., and Oliphant, E., 2020, Subannual stable isotope records reveal climate warming and seasonal anoxia associated with two extinction intervals across the Cretaceous-Paleogene boundary on Seymour Island, Antarctica: Geology, v. 48, https://doi.org/10.1130/G47758.1
